# Supplementary material for: Ultrasound-Assisted Heterogeneous Synthesis of Bio-Based Oligo-Isosorbide Glycidyl Ethers: Towards Greener Epoxy Precursors
Source: MDPI journal article supplement (doi:10.3390/molecules24091643), 2019-04-26
Supplement: s1 [file s1]

Type of the Paper (Article)

## Supplementary data for

# Ultrasound-Assisted Heterogeneous Synthesis of Bio-Based Oligo-Isosorbide Glycidyl Ethers: Towards Greener Epoxy Precursors

Corentin Musa, Pierre-Edouard Danjou, Antoine Pauwels, Francine Cazier-Dennin and François Delattre\*

Unité de Chimie Environnementale et Interactions sur le Vivant, Université du Littoral Côte d'Opale, 145 Avenue Maurice Schumann, MREI 1, 59140 Dunkerque, France

\* Correspondence: delattre@univ-littoral.fr

Received: date; Accepted: date; Published: date

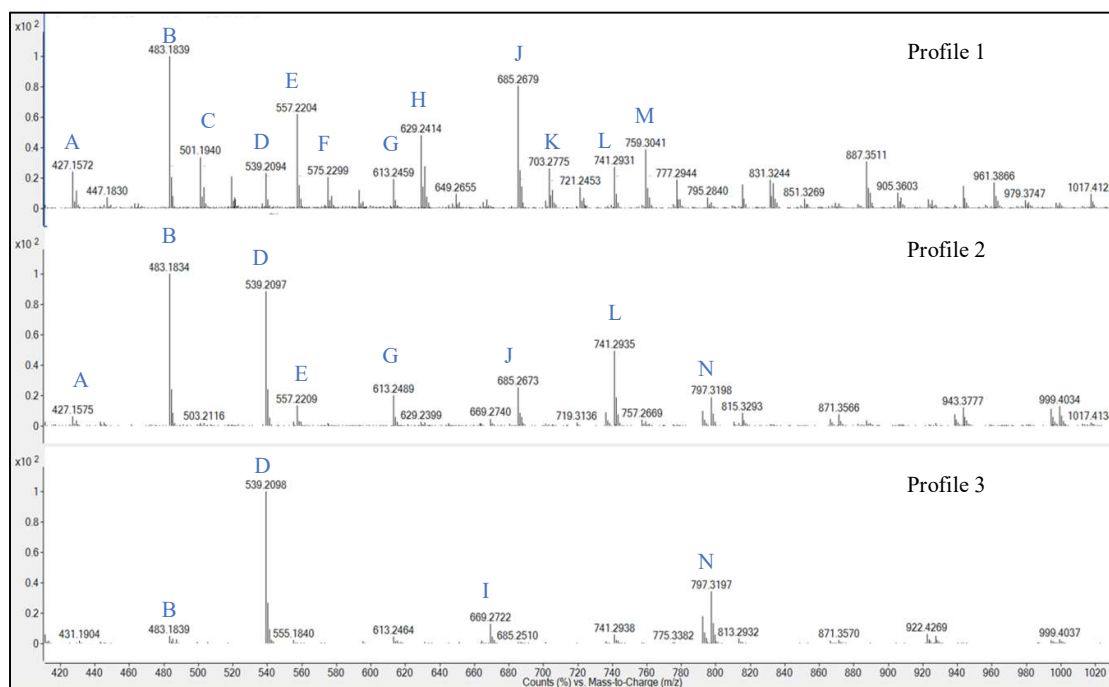

**Figure S1.** HRMS Q-TOF spectra of oligo-isosorbide glycidyl ethers for different profiles 1-3 with attribution according to Table S1.

Table S1. Structural attribution to HRMS peaks.

| Entry | Exact mass calculated for Na <sup>+</sup><br>adduct and mass found                                                                       | Proposed structures.<br>Red: desired epoxy groups; green: incomplete reaction; blue: epoxy hydrolysis |
|-------|------------------------------------------------------------------------------------------------------------------------------------------|-------------------------------------------------------------------------------------------------------|
| A     | Chemical Formula: C <sub>18</sub> H <sub>28</sub> NaO <sub>10</sub> <sup>+</sup><br>Exact Mass Calc.: 427.1575<br><b>Found: 427.1572</b> |                                                                                                       |
| B     | Chemical Formula: C <sub>21</sub> H <sub>32</sub> NaO <sub>11</sub> <sup>+</sup><br>Exact Mass Calc.: 483.1837<br><b>Found: 483.1839</b> |                                                                                                       |
| C     | Chemical Formula: C <sub>21</sub> H <sub>34</sub> NaO <sub>12</sub> <sup>+</sup><br>Exact Mass Calc.: 501.1942<br><b>Found: 501.1940</b> |                                                                                                       |
| D     | Chemical Formula: C <sub>24</sub> H <sub>36</sub> NaO <sub>12</sub> <sup>+</sup><br>Exact Mass Calc.: 539.2099<br><b>Found: 539.2094</b> |                                                                                                       |
| E     | Chemical Formula: C <sub>24</sub> H <sub>38</sub> NaO <sub>13</sub> <sup>+</sup><br>Exact Mass Calc.: 557.2205<br><b>Found: 557.2204</b> |                                                                                                       |
| F     | Chemical Formula: C <sub>24</sub> H <sub>40</sub> NaO <sub>14</sub> <sup>+</sup><br>Exact Mass Calc.: 575.2310<br><b>Found: 575.2299</b> |                                                                                                       |
| G     | Chemical Formula: C <sub>27</sub> H <sub>42</sub> NaO <sub>15</sub> <sup>+</sup><br>Exact Mass Calc.: 613.2467<br><b>Found: 613.2459</b> |                                                                                                       |
| H     | Chemical Formula: C <sub>27</sub> H <sub>42</sub> NaO <sub>15</sub> <sup>+</sup><br>Exact Mass Calc.: 629.2416<br><b>Found: 629.2414</b> |                                                                                                       |
| I     | Chemical Formula: C <sub>27</sub> H <sub>42</sub> NaO <sub>15</sub> <sup>+</sup><br>Exact Mass Calc.: 669.2729<br><b>Found: 669.2722</b> |                                                                                                       |
| J     | Chemical Formula: C <sub>30</sub> H <sub>46</sub> NaO <sub>16</sub> <sup>+</sup><br>Exact Mass Calc.: 685.2678<br><b>Found: 685.2679</b> |                                                                                                       |
| K     | Chemical Formula: C <sub>30</sub> H <sub>48</sub> NaO <sub>17</sub> <sup>+</sup><br>Exact Mass Calc.: 703.2784<br><b>Found: 703.2775</b> |                                                                                                       |

|          |                                                                                                      |                                                                                    |
|----------|------------------------------------------------------------------------------------------------------|------------------------------------------------------------------------------------|
| <b>L</b> | Chemical Formula: $C_{33}H_{50}NaO_{17}^{+}$<br>Exact Mass Calc.: 741.2940<br><b>Found: 741.2931</b> | 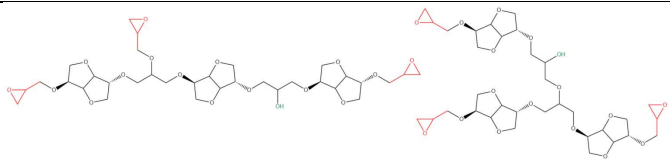 |
| <b>M</b> | Chemical Formula: $C_{33}H_{52}NaO_{18}^{+}$<br>Exact Mass Calc.: 759.3046<br><b>Found: 759.3041</b> |  |
| <b>N</b> | Chemical Formula: $C_{36}H_{54}NaO_{18}^{+}$<br>Exact Mass Calc.: 797.3202<br><b>Found: 797.3197</b> |  |
